# Supplementary material for: Kinetics and mechanism of the reactions of CH3CO and CH3C(O)CH2 radicals with O2. Low-pressure discharge flow experiments and quantum chemical computations
Source: Royal Society of Chemistry journal article supplement (doi:10.1039/b706216h), 2007-01-01
Supplement: b706216h.pdf [file b706216h.pdf]

**Derivation of expression for the OH yield of the reaction  $\text{CH}_3\text{CO} + \text{O}_2$**

**(ESI for the paper by Kovács et al.)**

$\Gamma_{1b}$  was determined by assuming a simple reaction scheme, consisting of reactions (1), (3) and the wall-loss of OH (wOH). To obtain Eq. (III), the following specific experimental conditions have to be taken into account: (i) in the experimental arrangement applied (see Fig. 1.) reactions (1) and (3) start at the same distance (i.e. reaction time) in our system (note, however, that  $\text{CH}_3\text{CHO}$  and  $\text{O}_2$  were premixed before entering the reactor); (ii) acetaldehyde is added in a concentration consistent with a pseudo-first-order assumption for reaction (3); (iii) the  $\text{O}_2$  concentration is increased until no further change in the OH concentration at any reaction times is observed.

The differential equation that describes OH loss in the absence of  $\text{O}_2$  is the following:

$$\frac{d[\text{OH}]}{dt} = -k'_3[\text{OH}] - k_{\text{wOH}}[\text{OH}], \quad [\text{OH}](t=0) = [\text{OH}]_0 \quad (\text{A1})$$

where  $k'_3 = k_3[\text{CH}_3\text{CHO}]$  is the pseudo-first order rate constant of reaction (3),  $k_{\text{wOH}}$  is the first-order wall loss rate constant for OH,  $t$  is the reaction time and  $[\text{OH}]_0$  is the initial OH concentration. The solution is a simple exponential function:

$$[\text{OH}](t) = e^{-(k'_3+k_{\text{wOH}})t} [\text{OH}]_0 \quad (\text{A2})$$

In the presence of  $\text{O}_2$ , however, OH radical is also formed in reaction (1b), therefore, the coupled differential equations to be solved are the following:

$$\frac{d[\text{OH}]^{\text{O}_2}}{dt} = -k'_3[\text{OH}]^{\text{O}_2} - k_{\text{wOH}}[\text{OH}]^{\text{O}_2} + k'_{1b}[\text{CH}_3\text{CO}], \quad [\text{OH}]^{\text{O}_2}(t=0) = [\text{OH}]_0 \quad (\text{A3a})$$

$$\frac{d[\text{CH}_3\text{CO}]}{dt} = k'_3[\text{OH}]^{\text{O}_2} - k'_1[\text{CH}_3\text{CO}], \quad [\text{CH}_3\text{CO}](t=0) = 0 \quad (\text{A3b})$$

where  $[\text{OH}]^{\text{O}_2}$  denotes the OH concentration in the presence of  $\text{O}_2$ . The solution of the above equations for OH is:

$$[\text{OH}]^{\text{O}_2}(t) = e^{-(k'_1+k'_3+k_{\text{wOH}}+\Omega)t/2} [\text{OH}]_0 \frac{(k'_1 - k'_3 + k_{\text{wOH}})(1 - e^{\Omega t}) + \Omega(1 + e^{\Omega t})}{2\Omega} \quad (\text{A4})$$

where

$$\Omega = \sqrt{(k'_3)^2 + (k'_1 - k_{\text{wOH}})^2 + k'_3(-2k'_1 + 4\Gamma_{\text{lb}}k'_1 + 2k_{\text{wOH}})} \quad (\text{A5})$$

The OH yield can be related to the relative change of the decay constant of OH in the absence ( $\kappa_0$ ) and in the presence ( $\kappa^*$ ) of O<sub>2</sub>:

$$\frac{\kappa_0 - \kappa^*}{\kappa_0} = \frac{d \ln[\text{OH}]^{\text{O}_2} / dt - d \ln[\text{OH}] / dt}{d \ln[\text{OH}] / dt} \quad (\text{A6})$$

Differentiation of the corresponding expressions yield:

$$\frac{\kappa_0 - \kappa^*}{\kappa_0} = \frac{2(-1 + e^{\Omega t})\Gamma_{\text{lb}}k'_1k'_3}{(k'_3 + k_{\text{wOH}})(k'_3 - k'_1 + k'_{\text{wOH}})(1 - e^{\Omega t}) + \Omega(1 + e^{\Omega t})} \quad (\text{A7})$$

Under the conditions applied in the experiments, the following relationships were always satisfied:

(i)  $k'_1 \gg k'_3, k_{\text{wOH}}$ , therefore  $\Omega \approx k_1$

(ii)  $k'_1 t \gg 0$  on the timescale of interest (10-100 ms), therefore  $1 \ll e^{\Omega t}$

Using both (i) and (ii), Eq. (A7) simplifies to:

$$\frac{\kappa_0 - \kappa^*}{\kappa_0} = \Gamma_{\text{lb}} \frac{k'_3}{k'_3 + k_{\text{wOH}}} = \Gamma_{\text{lb}} \frac{\kappa_0 - k_{\text{wOH}}}{\kappa_0}, \quad (\text{A8})$$

which is equivalent to Eq. (III).
